# Supplementary material
Source: HighWire-hosted journal article supplement (http://ajnr-stage2.highwire.org/highwire/filestream/101139/field_highwire_adjunct_files/0/0830.pdf)
Supplement: 0830.pdf [file 0830.pdf]

## Online Supplemental Data

**Online Table 1.** Comparison of MRI findings for meningiomas and malignant dural-based tumors

| Variables                                  | Meningiomas<br>( <i>n</i> =102) | Malignant dural-<br>based tumors<br>( <i>n</i> =31) | P-value |
|--------------------------------------------|---------------------------------|-----------------------------------------------------|---------|
| <b><u>Morphology</u></b>                   |                                 |                                                     |         |
| <b>Dural tail</b>                          |                                 |                                                     |         |
| Absent                                     | 2 (2%)                          | 6 (19.4%)                                           | <0.001* |
| Present                                    | 100 (98%)                       | 25 (80.6%)                                          | <0.001* |
| <b>Osseous destruction</b>                 |                                 |                                                     |         |
| Absent                                     | 20 (19.6%)                      | 3 (9.7%)                                            | 0.200   |
| Marrow edema                               | 76 (74.5%)                      | 6 (19.4%)                                           | <0.001* |
| Cortical disruption                        | 1 (1%)                          | 1 (3.2%)                                            | 0.368   |
| Cortical breakthrough                      | 5 (4.9%)                        | 21 (67.7%)                                          | <0.001* |
| <b>Hyperostosis</b>                        |                                 |                                                     |         |
| Absent                                     | 26 (25.5%)                      | 31 (100%)                                           | <0.001* |
| Present                                    | 76 (74.5%)                      | 0 (0%)                                              | <0.001* |
| <b><u>Contrast-enhanced (CE) FLAIR</u></b> |                                 |                                                     |         |
| <b>Rim-CE</b>                              |                                 |                                                     |         |
| No rim visible                             | 4 (3.9%)                        | 23 (74.2%)                                          | <0.001* |
| Rim visible <50%                           | 1 (1%)                          | 6 (19.4%)                                           | <0.001* |
| Rim visible ≥50%, <100%                    | 6 (5.9%)                        | 0 (0%)                                              | 0.167   |
| Complete rim enhancement                   | 91 (89.2%)                      | 2 (6.5%)                                            | <0.001* |

| Variables                         | Meningiomas<br>( <i>n</i> =102) | Malignant dural-<br>based tumors<br>( <i>n</i> =31) | P-value |
|-----------------------------------|---------------------------------|-----------------------------------------------------|---------|
| <b>Peritumoral edema</b>          |                                 |                                                     |         |
| No edema                          | 39 (38.2%)                      | 17 (54.8%)                                          | 0.101   |
| Edema <2 cm                       | 37 (36.3%)                      | 3 (9.7%)                                            | 0.005   |
| Edema ≥2 cm                       | 26 (25.5%)                      | 11 (35.5%)                                          | 0.277   |
| <b>Leptomeningeal enhancement</b> |                                 |                                                     |         |
| Absent                            | 102 (100%)                      | 21 (67.7%)                                          | <0.001* |
| Present                           | 0 (0%)                          | 10 (32.3%)                                          | <0.001* |
| <b><u>T2WI</u></b>                |                                 |                                                     |         |
| Isosignal intensity               | 25 (24.5%)                      | 7 (22.6%)                                           | 0.826   |
| Hyposignal intensity              | 4 (3.9%)                        | 8 (25.8%)                                           | <0.001* |
| Hypersignal intensity             | 73 (71.6%)                      | 16 (51.6%)                                          | 0.017   |
| <b><u>CE-T1WI</u></b>             |                                 |                                                     |         |
| Homogeneous enhancement           | 75 (73.5%)                      | 9 (29%)                                             | <0.001* |
| Heterogeneous enhancement         | 27 (26.5%)                      | 22 (71%)                                            | <0.001* |

**Online Table 2.** Comparison of MRI findings for meningiomas of WHO grades 1, 2, and 3

| Variables                           | WHO 1      | WHO 2      | WHO 3     | P-value |
|-------------------------------------|------------|------------|-----------|---------|
|                                     | (n=72)     | (n=22)     | (n=8)     |         |
| <u>Morphology</u>                   |            |            |           |         |
| <b>Dural tail</b>                   |            |            |           |         |
| Absent                              | 1 (1.4%)   | 0 (0%)     | 1 (12.5%) | 0.075   |
| Present                             | 71 (98.6%) | 22 (100%)  | 7 (87.5%) |         |
| <b>Osseous destruction</b>          |            |            |           |         |
| No cortical breakthrough            | 72 (100%)  | 21 (95.5%) | 4 (50%)   | <0.001* |
| Cortical breakthrough               | 0 (0%)     | 1 (4.5%)   | 4 (50%)   |         |
| <b>Hyperostosis</b>                 |            |            |           |         |
| Absent                              | 14 (19.4%) | 8 (36.4%)  | 4 (50%)   | 0.071   |
| Present                             | 58 (80.6%) | 14 (63.6%) | 4 (50%)   |         |
| <u>Contrast-enhanced (CE) FLAIR</u> |            |            |           |         |
| <b>Rim-CE</b>                       |            |            |           |         |
| Rim enhancement <50%                | 4 (5.6%)   | 1 (4.5%)   | 0 (0%)    | 0.785   |
| Rim enhancement ≥50%, <100%         | 68 (94.4%) | 21 (95.5%) | 8 (100%)  |         |
| <b>Peritumoral edema</b>            |            |            |           |         |
| No edema                            | 31 (43.1%) | 8 (36.4%)  | 0 (0%)    | 0.001*  |
| Edema <2 cm                         | 30 (41.7%) | 5 (22.7%)  | 2 (25%)   |         |
| Edema ≥2 cm                         | 11 (15.3%) | 9 (40.9%)  | 6 (75%)   |         |
| <b>Leptomeningeal enhancement</b>   |            |            |           |         |
| Absent                              | 72 (100%)  | 22 (100%)  | 8 (100%)  | N/A     |
| Present                             | 0 (0%)     | 0 (0%)     | 0 (0%)    |         |

| Variables                 | WHO 1<br>(n=72) | WHO 2<br>(n=22) | WHO 3<br>(n=8) | P-value |
|---------------------------|-----------------|-----------------|----------------|---------|
| <b><u>T2WI</u></b>        |                 |                 |                | 0.754   |
| Isosignal intensity       | 18 (25%)        | 5 (22.7%)       | 2 (25%)        |         |
| Hyposignal intensity      | 2 (2.8%)        | 1 (4.5%)        | 1 (12.5%)      |         |
| Hypersignal intensity     | 52 (72.2%)      | 16 (72.7%)      | 5 (62.5%)      |         |
| <b><u>CE-T1WI</u></b>     |                 |                 |                |         |
| Homogeneous enhancement   | 59 (81.9%)      | 14 (63.6%)      | 2 (25%)        | 0.001*  |
| Heterogeneous enhancement | 13 (18.1%)      | 8 (36.4%)       | 6 (75%)        |         |

**Online Figure 1.** A diagnostic framework for differentiating between meningioma and malignant dural-based tumor.

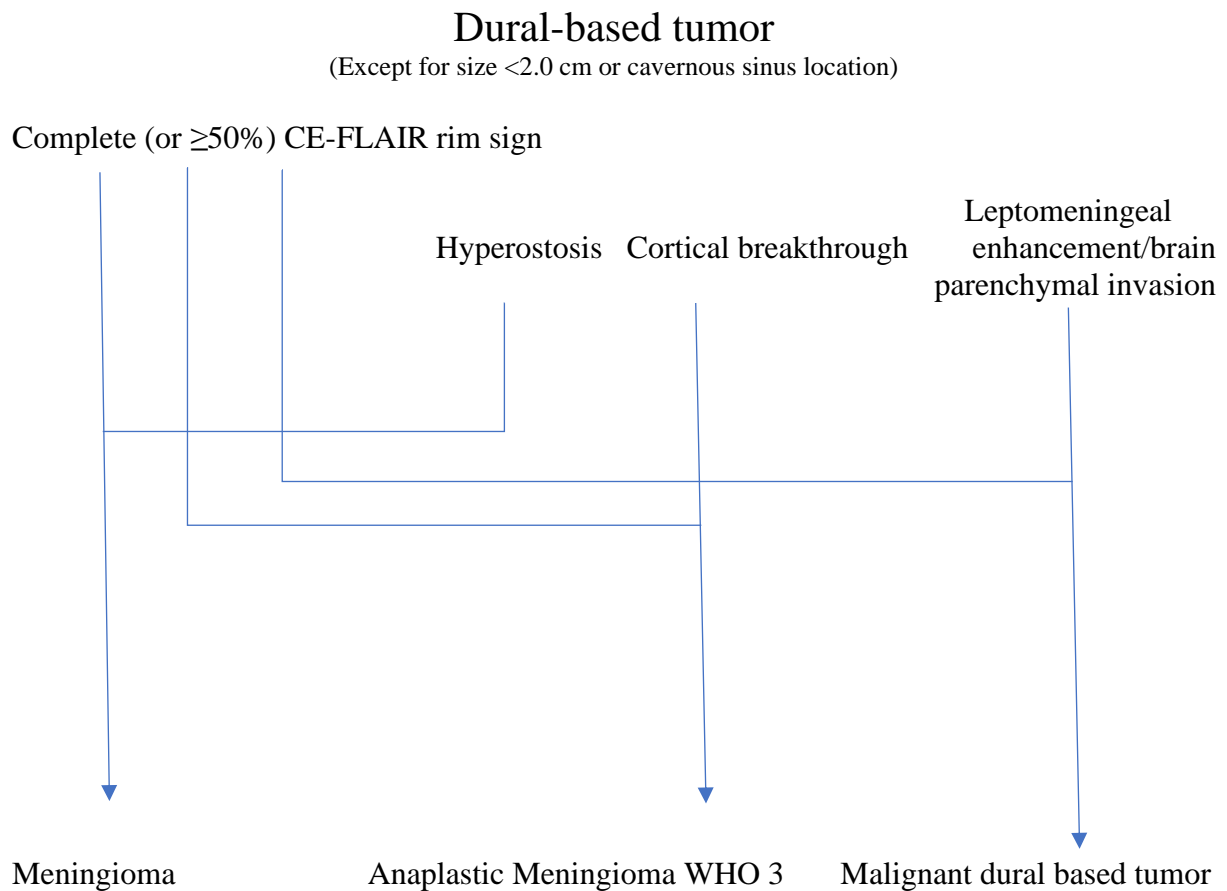

**Description:** For the dural-based tumor >2.0 cm and except for those at intracavernous locations, our study recommends evaluating the rim enhancement of the tumor-brain interface on the CE-FLAIR sequence (CE-FLAIR rim sign) in the first step.

For the tumor with complete or  $\geq 50\%$  CE-FLAIR rim sign, meningioma is the favored diagnosis. In addition, if associated with hyperostosis, meningioma is highly suggested.

For the tumor with complete or  $\geq 50\%$  CE-FLAIR rim sign and evidence of cortical breakthrough, anaplastic meningioma (WHO 3) is the favored diagnosis.

For the tumor with complete or  $\geq 50\%$  CE-FLAIR rim sign and accompanied by leptomeningeal enhancement and brain parenchymal invasion, the malignant dural-based tumor is the favored diagnosis.

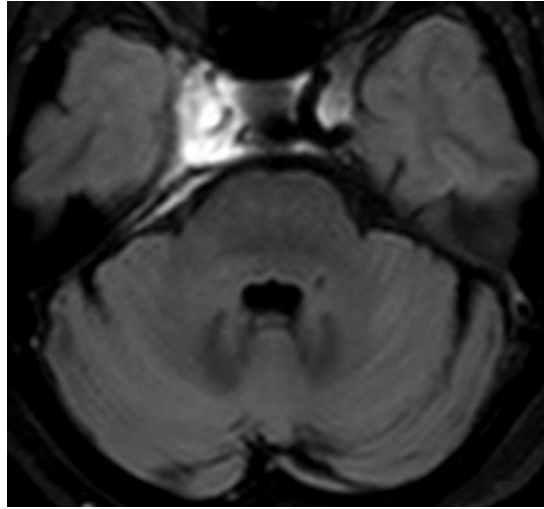

**Online Figure 2.** Cavernous meningioma. CE-FLAIR sequence demonstrates a homogeneously enhancing mass at the right cavernous sinus without rim enhancement on the tumor-brain interface, pathologically proved meningioma. Four cases (3.9%) of cavernous meningioma in our study demonstrate no rim enhancement on CE-FLAIR sequence according to no pial circulation. This finding shows the limitation of using the CE-FLAIR rim sign to predict meningioma in this location.
